# Supplementary material
Source: PubMed Central journal article supplement (PMC6298239)
Supplement: ddy334_supp.pdf [file ddy334_supp.pdf]

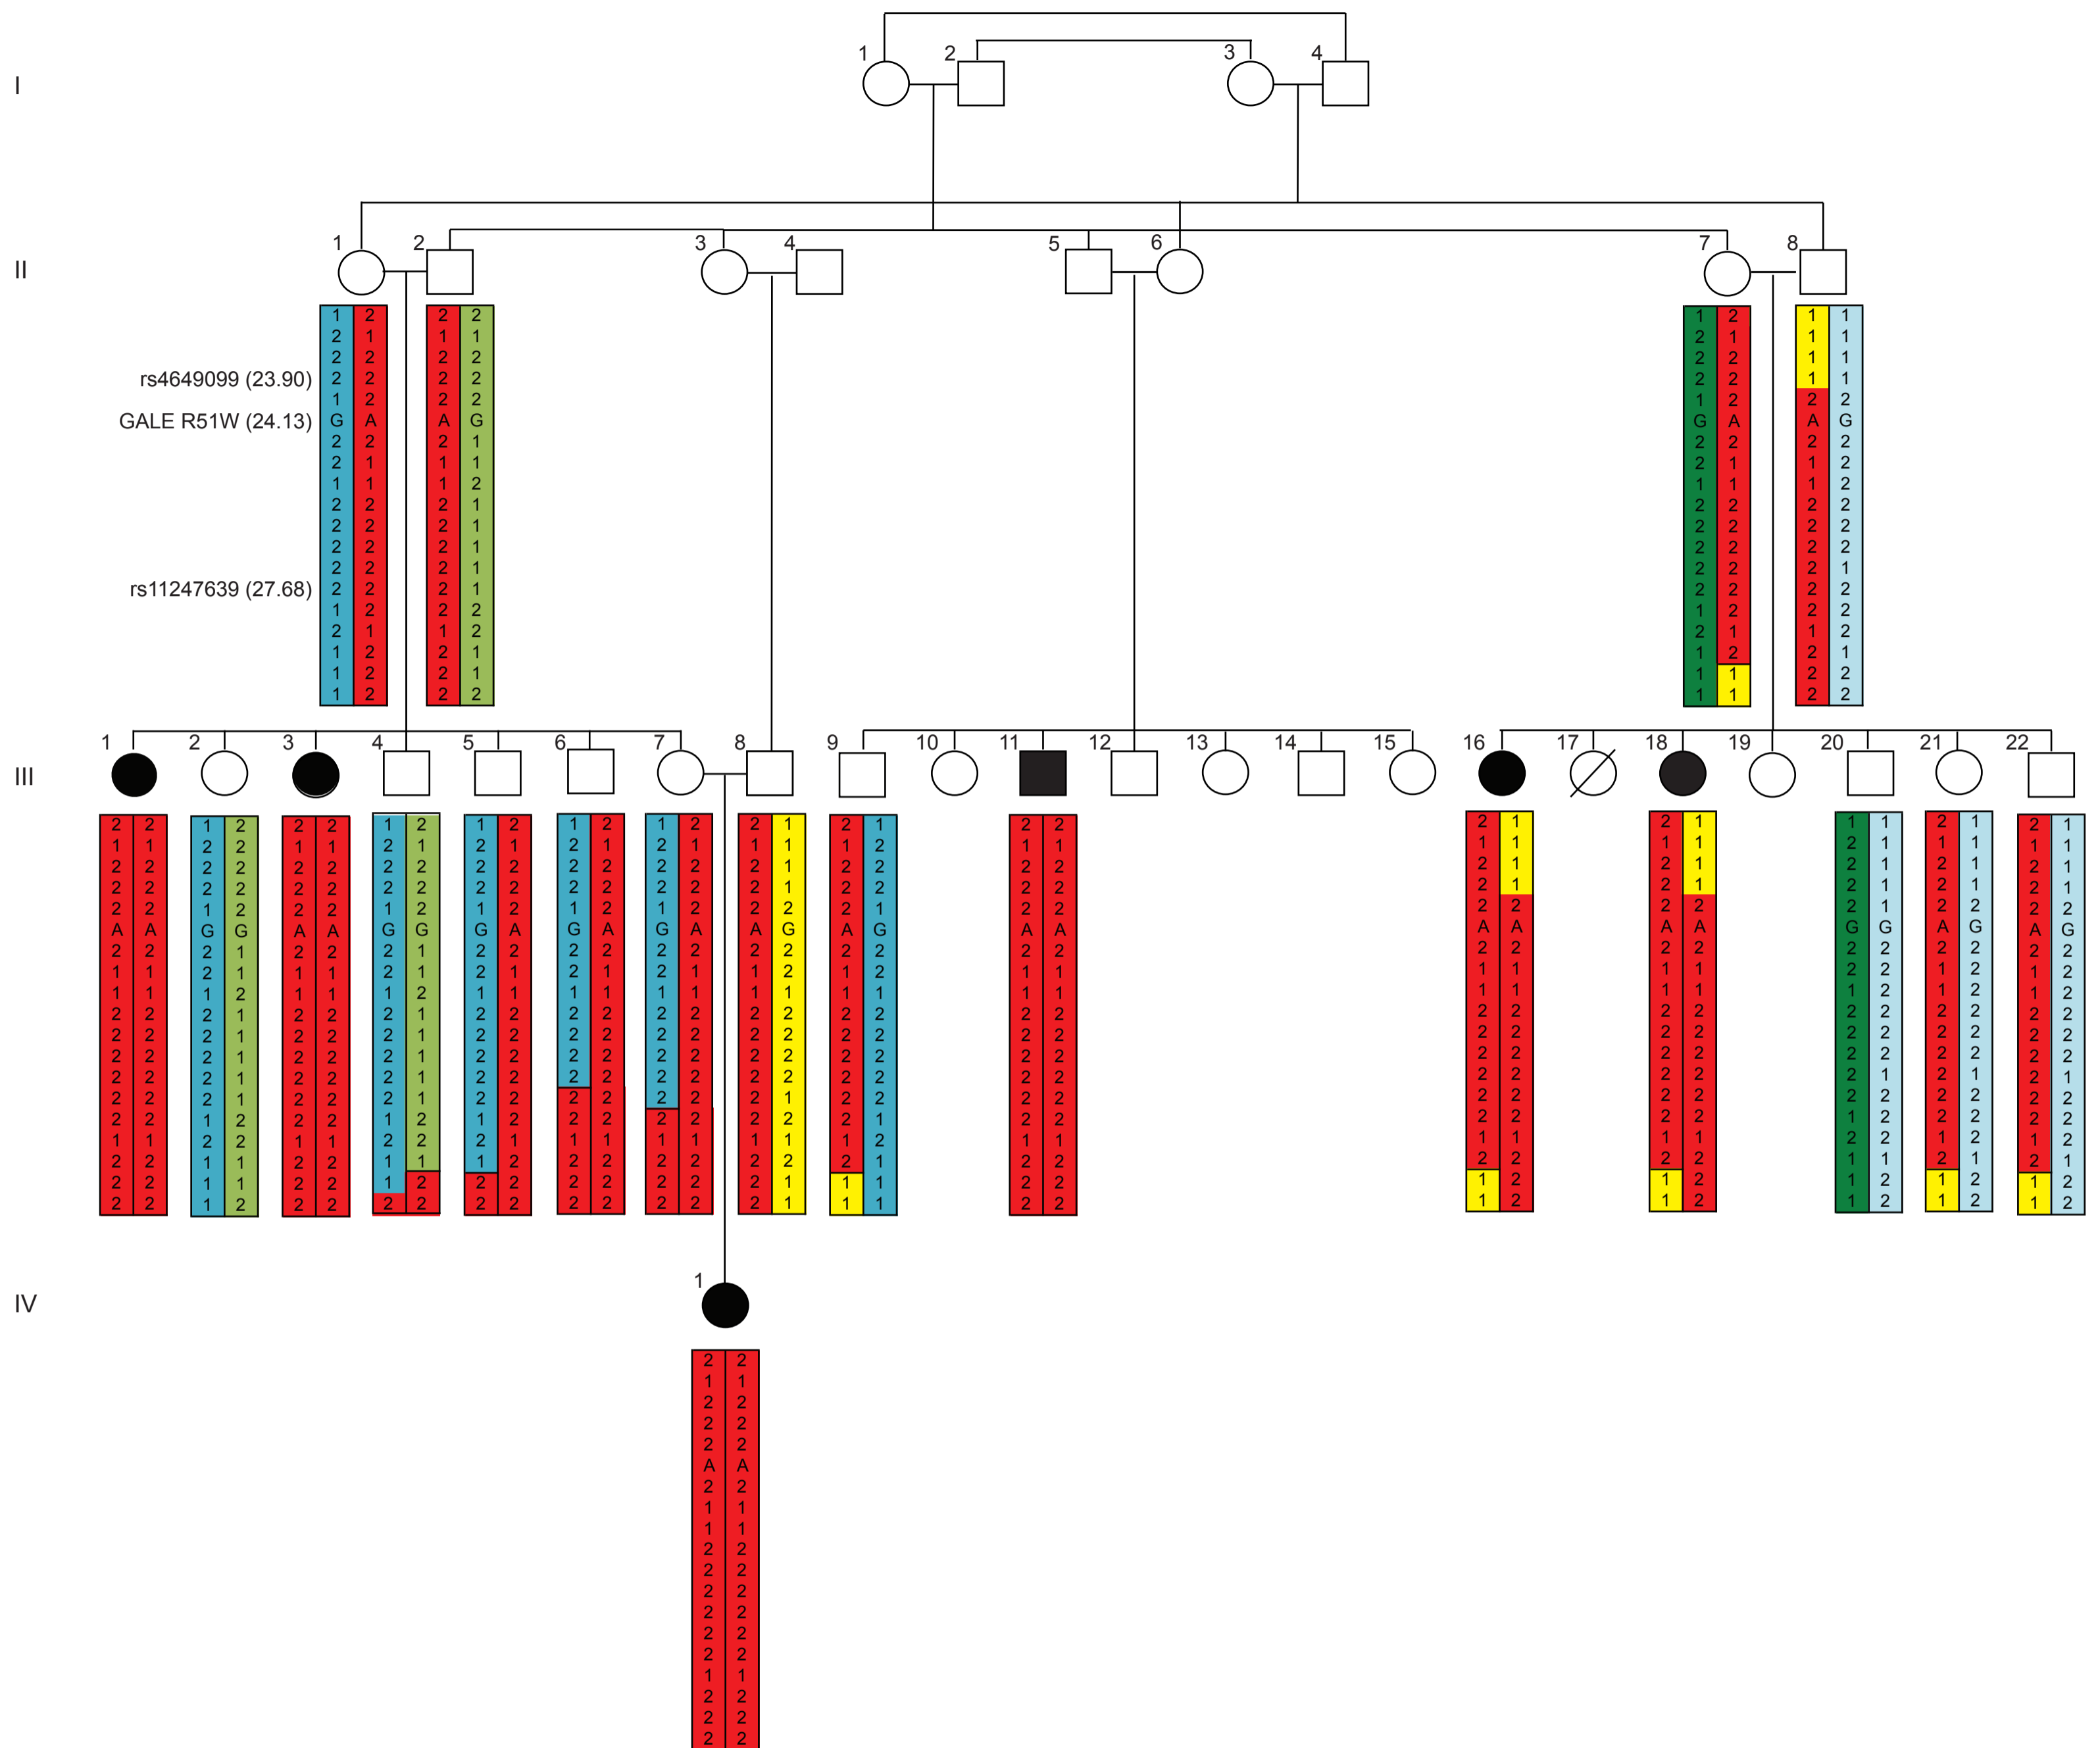

**Supplementary Figure 1. Chromosome 1p haplotypes in family AH.** Haplotypes were determined by SNP microarrays. A indicates the variant allele and G the reference allele at genomic position chr1:24125191 (hg19), corresponding to GALE p.R51W (c.C151T). SNP alleles are indicated 1 or 2. The 3.78MB region of homozygosity shared by all affected individuals were bounded by rs4649099 and rs 11247639, based recombination events in relatives III.6, III.16, and III.18.

**A**

whole genome

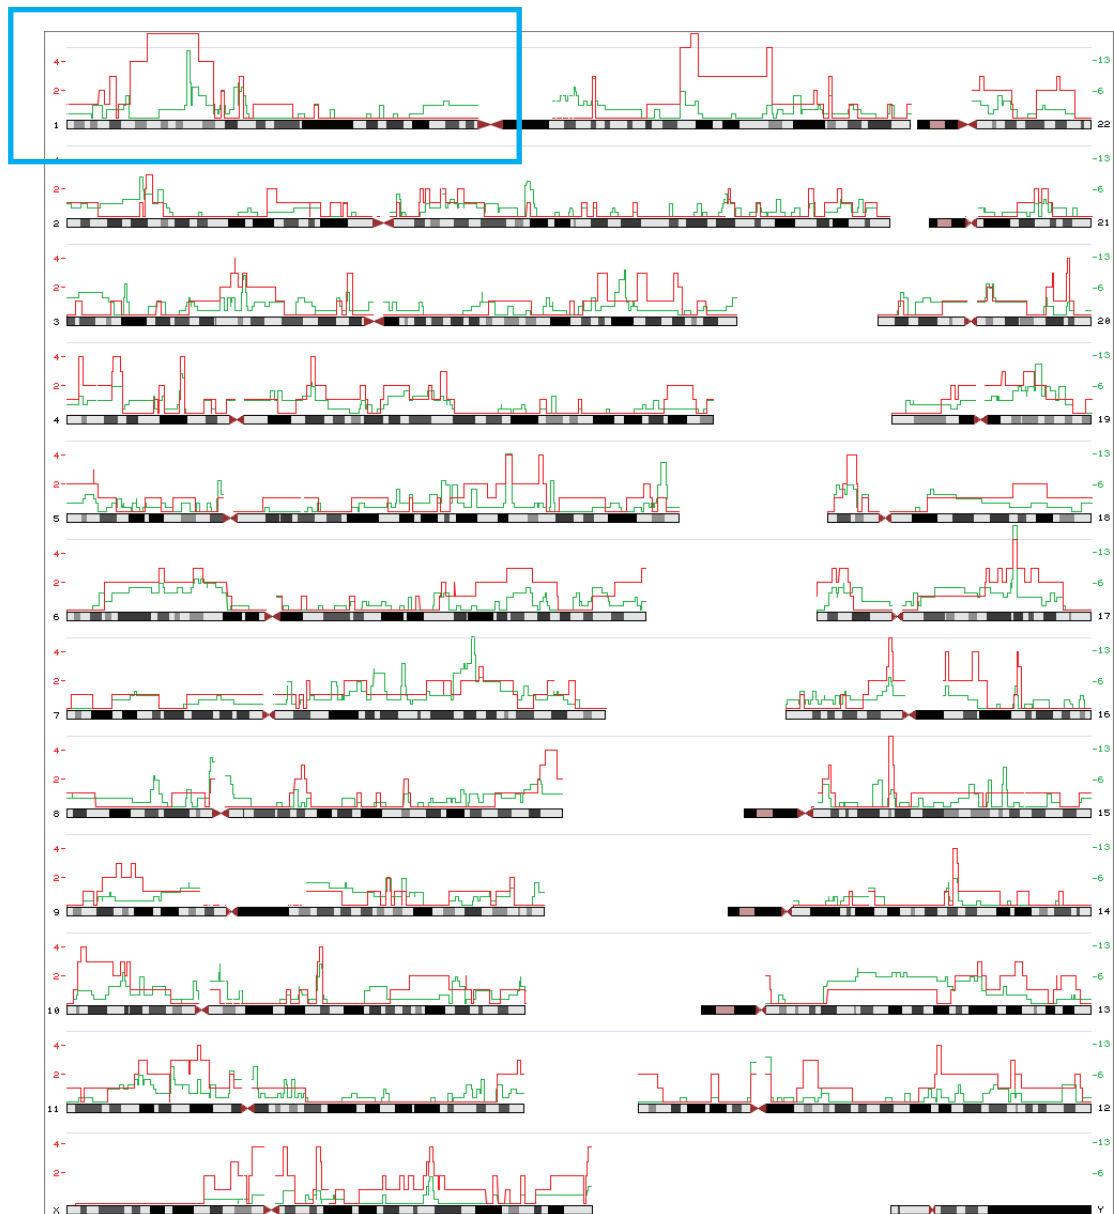**B**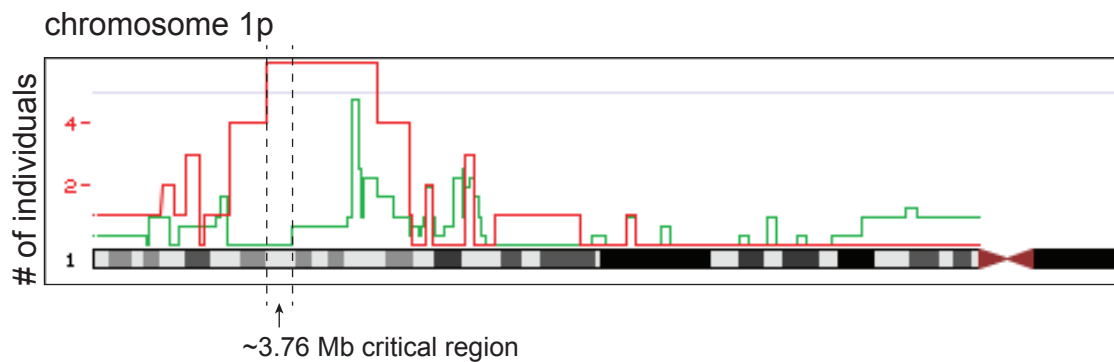

**Supplementary Figure 2. Homozygosity mapping.** At each chromosomal position, histograms indicate the number of affected (red) and unaffected (green) individuals homozygous for the same allele. A) Whole genome overview. Chromosomes 1-23 are numbered top to bottom (left) then bottom to top (right). Blue box indicates the region enlarged in part B. B) Enlarged view of chromosome 1p. The 3.76 MB region between the dashed lines is the only region genome wide in which all affected individuals, and no unaffected individuals, share homozygosity for the same alleles.

7 bp sequence  
flanking intergenic variant

5' GCCACAAATAGCTGT 3'

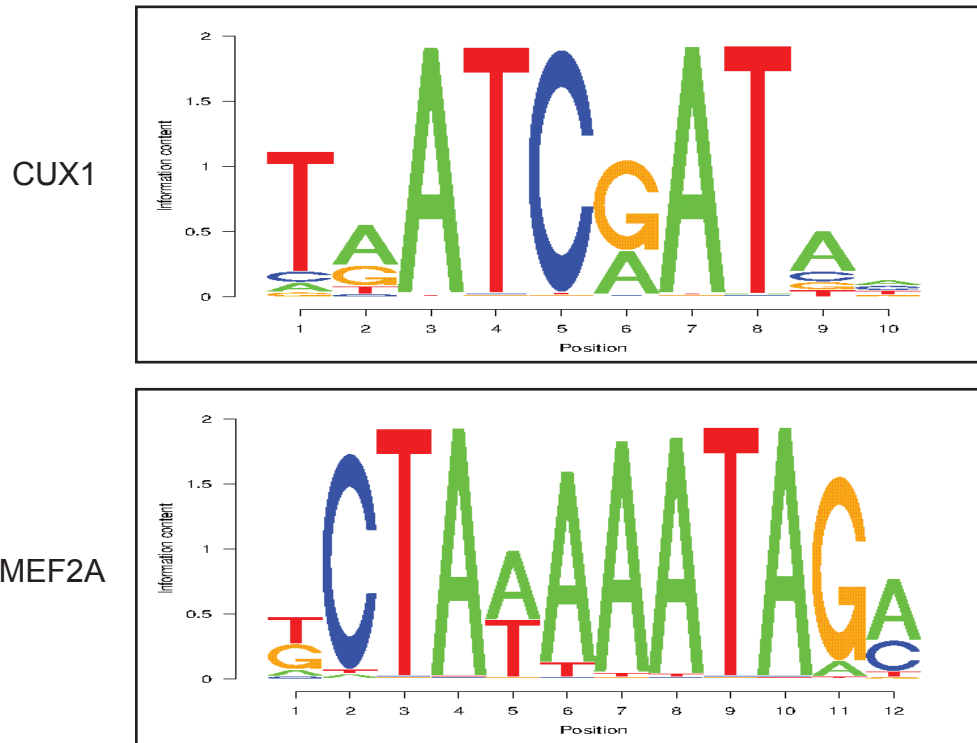

**Supplementary Figure 3. Predicted transcription factor binding sites at rs565347299.**

Position weight matrices for transcription factors predicted to bind the region surrounding the intergenic variant upstream of *RUNX3*. Matrices based on the JASPAR CORE 2018 database.

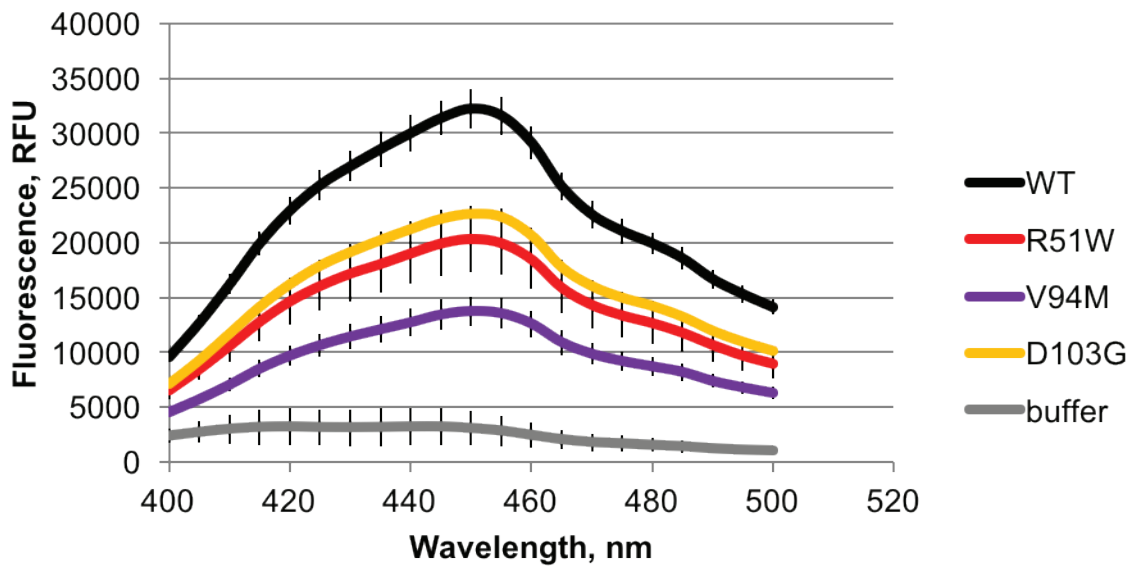

**Supplementary Figure 4. NAD<sup>+</sup> binding to GALE variant proteins.**

Protein samples were excited at 350 nm and emission spectra collected at 400-500 nm. Fluorescence +/- SD in RFU is reported for each variant. For each variant protein, each data point is the average of three independent experiments.

**A**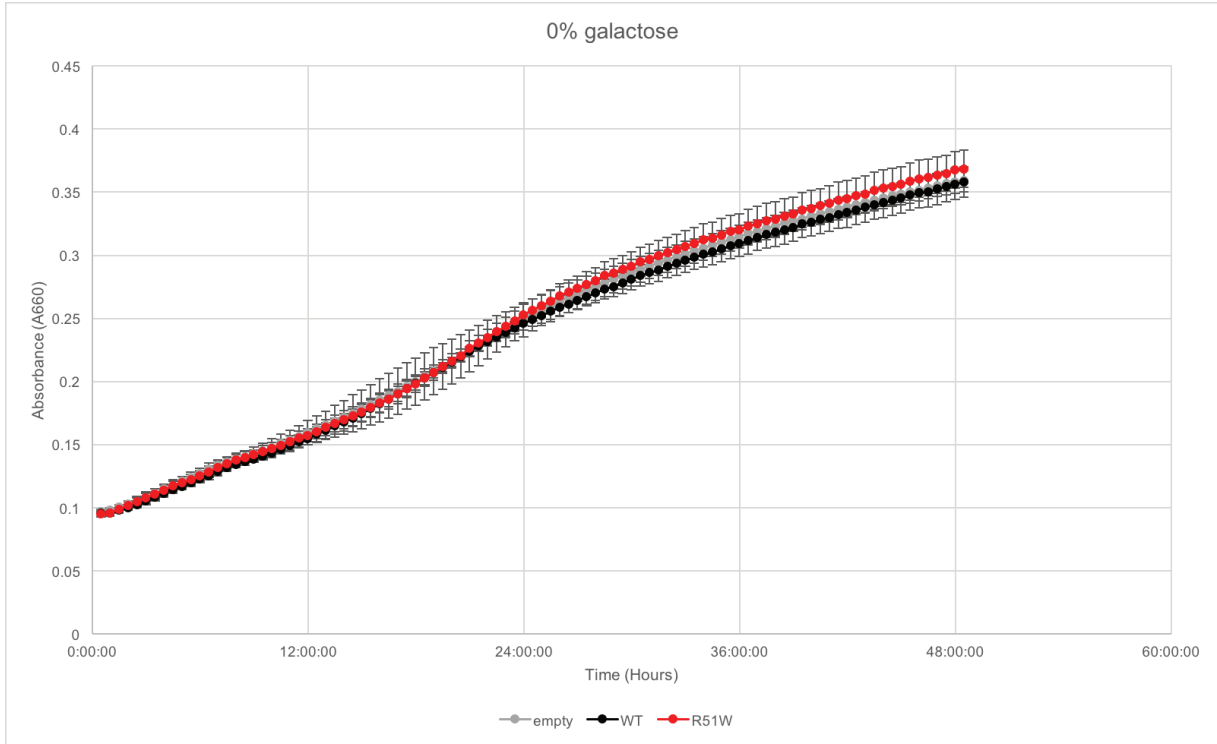**B**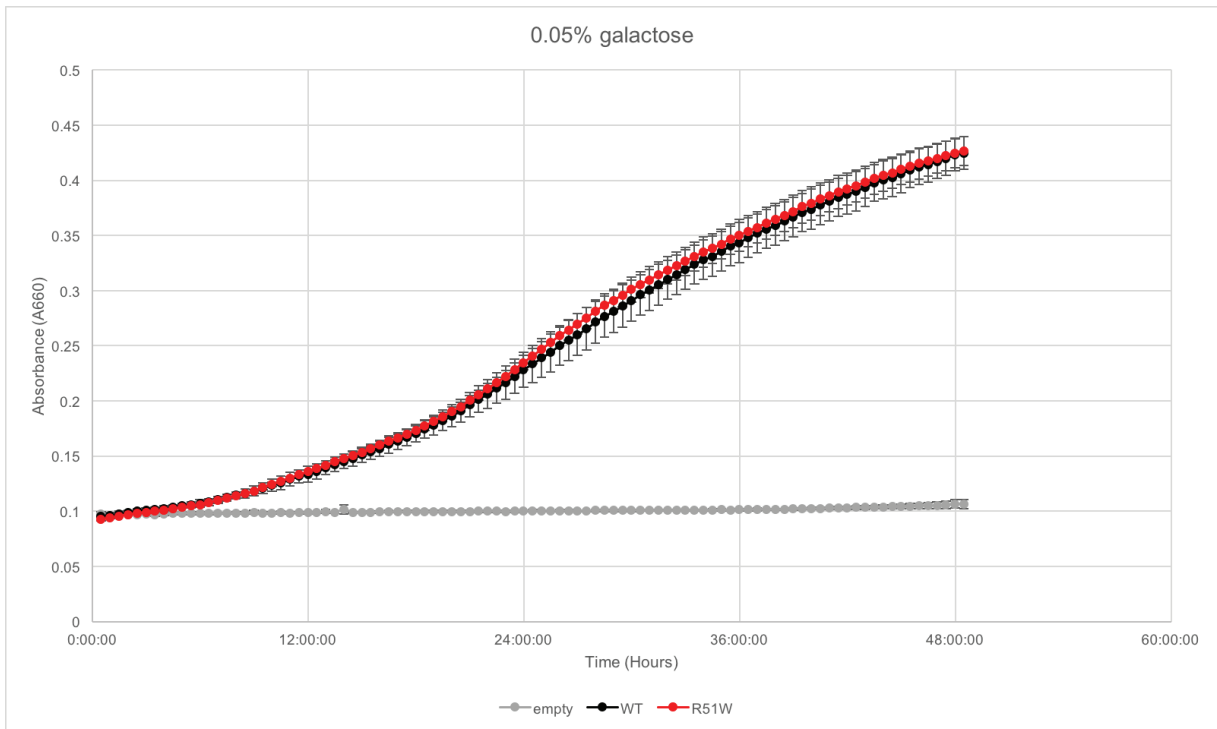

**Supplementary Figure 5. Complementation by *GALE* alleles in yeast following galactose challenge.** *S. cerevisiae* with deletion of endogenous *GALE* was complemented with empty vector, on normal human *GALE* (WT), or human *GALE* R51W. Absorbance at 660 nm was measured every 30 min. Experiment performed in biological triplicate. A) Growth assay with no galactose in media B) Growth assay with 0.05% galactose in media.

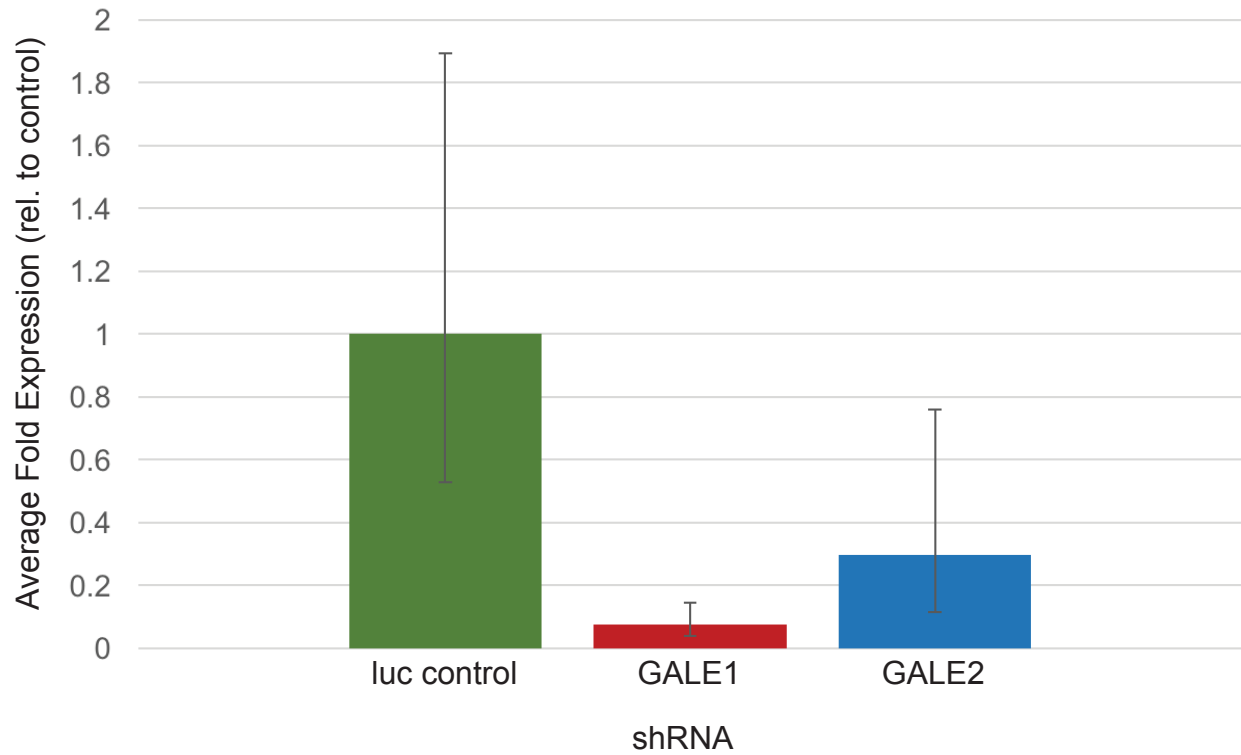

**Supplementary Figure 6. *GALE* shRNA knockdown efficiency.**

Real-time qPCR was performed in 293T cells with *GALE* TaqMan probe and normalized to GAPDH signal with ddCT analysis. Data are plotted as average fold expression + SD compared to luciferase control. Each experiment was run in quadruplicate.

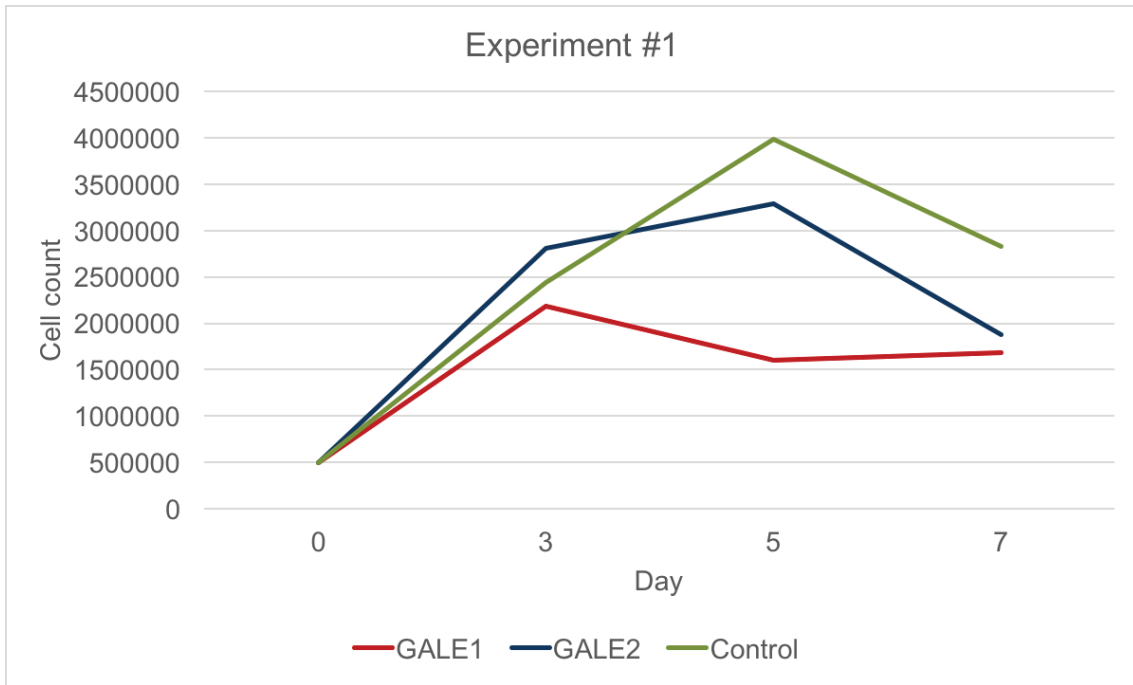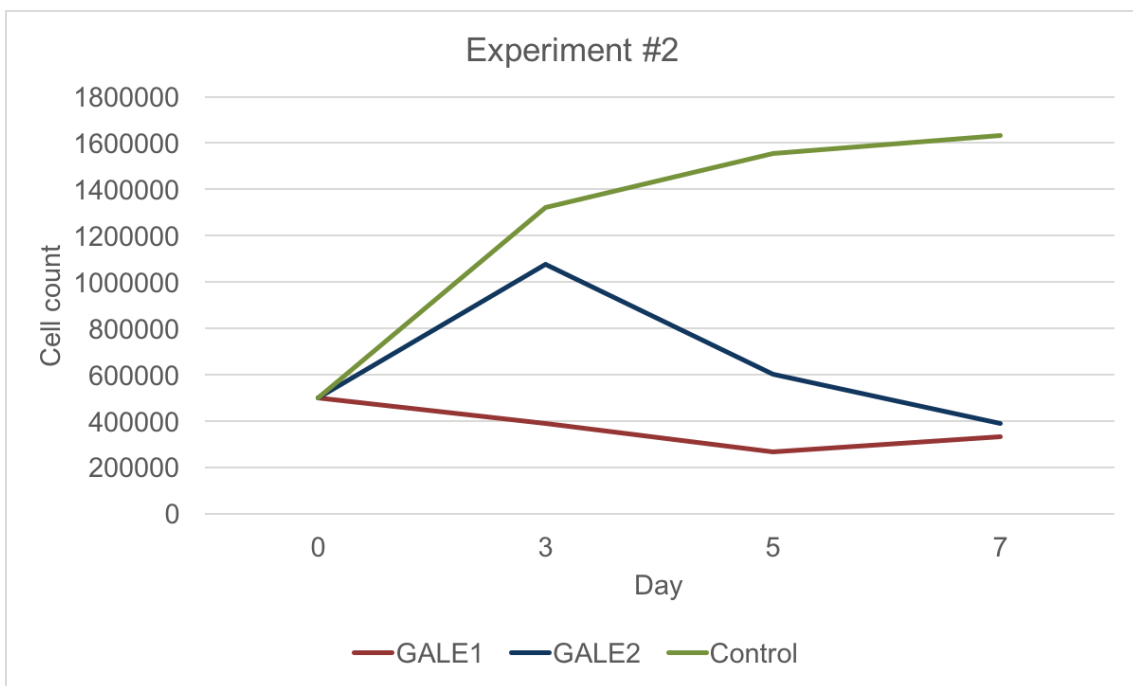

**Supplementary Figure 7. Megakaryocyte proliferation in liquid culture for shRNA knockdown of GALE.** Cord-blood-derived CD34+ cells treated with control or *GALE* shRNA viruses were sorted to collect successfully transduced cells. For each condition, 500,000 cells were plated in liquid culture under megakaryocyte growth conditions and cells counted on days 0, 3, 5, and 7. Top and bottom graphs represent counts from two independent experiments.

## Supplementary Tables

**Table S1.** Complete Blood Counts.

| Patient | Hemoglobin (g/dL) | MCV (fL) | WBC ( $\times 10^9/L$ ) | ANC | PLT |
|---------|-------------------|----------|-------------------------|-----|-----|
| III-1   | 8.2               | 81       | 4                       | 0.8 | 8   |
| III-3   | 8.7               | 83       | 4.2                     | 0.6 | 10  |
| III-11  | 7.9               | 61       | 3                       | 1.8 | 16  |
| III-16  | 8.5               | 85       | 4.2                     | 1.2 | 15  |
| III-18  | 10.5              | 86       | 4.3                     | 1   | 50  |
| IV-1    | 12.1              | 81       | 8.8                     | 1   | 44  |

MCV: mean corpuscular volume, WBC: white blood count, ANC: absolute neutrophil count, PLT: platelet

**Table S2.** Gene expression measured by RNA-Seq for *RPL11* and *RUNX3*.

Samples were prepared in duplicate. For each sample, Z scores were calculated compared to nine control samples. LIN28A expression was not detectable in RNA from lymphoblasts.

| Gene         | Proband replicate1 | Proband replicate2 | Mother replicate1 | Mother replicate2 | Father replicate1 | Father replicate2 |
|--------------|--------------------|--------------------|-------------------|-------------------|-------------------|-------------------|
| <i>RPL11</i> | -0.81              | -0.56              | -0.33             | -0.44             | -0.41             | -0.99             |
| <i>RUNX3</i> | 0.83               | 0.63               | -0.11             | -1.12             | 0.19              | 1.27              |



**Table S3.** Rare variants from whole genome sequencing located in the homozygous region shared by all affected individuals in family AH, and either conserved (GERP >2.0) or in proximity to a gene possibly implicated in bone marrow failure.

| Chr | Coordinate | Ref | Var                                                | Type       | Gene                | Gerp  | Cons TFS         | Encode HMM      | Chipseq                                       | DNaseI |
|-----|------------|-----|----------------------------------------------------|------------|---------------------|-------|------------------|-----------------|-----------------------------------------------|--------|
| 1   | 24,020,197 | G   | A                                                  | intronic   | RPL11               | -1.3  | -                | Strong Enhancer | HEY1                                          | 5      |
| 1   | 24,125,191 | G   | A                                                  | missense   | GALE                | +4.8  | -                | Insulator       | CTCF_(SC-5916),CTCF                           | 20     |
| 1   | 25,184,753 | A   | G                                                  | intergenic | RUNX3 (dist=41249)  | +0.2  | -                | Weak Txn        | -                                             | -      |
| 1   | 25,186,263 | -   | CACAC<br>ACACA<br>CACAC<br>ACACA<br>CACAT<br>ATATT | intergenic | RUNX3 (dist=39739)  | indel | -                | Weak Txn        | -                                             | -      |
| 1   | 25,187,920 | C   | T                                                  | intergenic | RUNX3 (dist=38082)  | +0.6  | -                | Weak Txn        | -                                             | -      |
| 1   | 25,242,297 | G   | A                                                  | intronic   | RUNX3               | -3.0  | -                | Txn Transition  | -                                             | 13     |
| 1   | 25,250,541 | C   | T                                                  | intronic   | RUNX3               | +0.7  | -                | Strong Enhancer | -                                             | -      |
| 1   | 25,252,493 | G   | A                                                  | intronic   | RUNX3               | -2.9  | -                | Strong Enhancer | Pol2-4H8                                      | -      |
| 1   | 25,324,183 | A   | G                                                  | intergenic | RUNX3 (dist=32682)  | +4.3  | CDP CR3_01 (865) | Weak Enhancer   | -                                             | 7      |
| 1   | 25,905,634 | C   | T                                                  | intergenic | MAN1C1 (dist=38325) | +2.2  | -                | Heterochrom/lo  | -                                             | -      |
| 1   | 26,068,576 | G   | A                                                  | intronic   | MAN1C1              | +2.1  | -                | Repressed       | -                                             | -      |
| 1   | 26,258,357 | T   | C                                                  | intergenic | PAFAH2 (dist=27901) | -1.0  | -                | Heterochrom/lo  | -                                             | -      |
| 1   | 26,728,707 | C   | T                                                  | intergenic | LIN28A (dist=8562)  | -2.4  | -                | Heterochrom/lo  | STAT3                                         | -      |
| 1   | 27,084,517 | T   | C                                                  | intronic   | ARID1A              | +3.8  | -                | Txn Elongation  | -                                             | -      |
| 1   | 27,320,968 | C   | T                                                  | UTR3       | TRNP1               | +2.3  | -                | Poised Promoter | Pol2, GABP, TAF1, ZBTB7A (SC-34508), Pol2-4H8 | -      |
| 1   | 27,625,246 | C   | T                                                  | intronic   | WDTC1               | +3.0  | -                | Weak Txn        | -                                             | 5      |

**Table S4.** Fraction product (UDP-glc or UDP-glcNAc) from GALE enzyme assays

| <b>Substrate</b> | <b>GALE Proteins</b> |             |             |              |
|------------------|----------------------|-------------|-------------|--------------|
|                  | <b>WT</b>            | <b>R51W</b> | <b>V94M</b> | <b>D103G</b> |
| UDP-gal          | 0.426                | 0.235       | 0.004       | 0.201        |
| UDP-gal          | 0.431                | 0.138       | 0.003       | 0.28         |
| UDP-gal          | 0.434                | 0.137       | 0.004       | 0.179        |
| UDP-galNAc       | 0.305                | 0.121       | 0.017       | 0.153        |
| UDP-galNAc       | 0.296                | 0.114       | 0.016       | 0.143        |
| UDP-galNAc       | 0.287                | 0.114       | 0.015       | 0.121        |
| UDP-galNAc       | 0.315                | 0.117       | 0.012       | 0.157        |

**Table S5.** Cell proliferation under megakaryocyte growth conditions after shRNA knockdown

|         | Expt | Days after seeding 500,000 cells from each treatment |           |           |           |
|---------|------|------------------------------------------------------|-----------|-----------|-----------|
|         |      | 0                                                    | 3         | 5         | 7         |
| GALE1   | 1    | 500,000                                              | 2,180,000 | 1,600,000 | 1,680,000 |
| GALE2   | 1    | 500,000                                              | 2,810,000 | 3,289,000 | 1,880,000 |
| Control | 1    | 500,000                                              | 2,440,000 | 3,989,999 | 2,826,700 |
| GALE1   | 2    | 500,000                                              | 388,889   | 266,667   | 333,333   |
| GALE2   | 2    | 500,000                                              | 1,077,778 | 600,000   | 388,889   |
| Control | 2    | 500,000                                              | 1,322,222 | 1,555,556 | 1,633,333 |

**Table S6.** Size Distribution of Megakaryocyte Colonies

| shRNA   | Expt  | Rep | total colonies counted | small (3-20 cells) | medium (21-49 cells) | large (>50 cells) | Prop large colonies | P vs control |
|---------|-------|-----|------------------------|--------------------|----------------------|-------------------|---------------------|--------------|
| GALE1   | 1     | A   | 170                    | 85                 | 56                   | 29                | 0.171               |              |
| GALE1   | 1     | B   | 137                    | 57                 | 42                   | 38                | 0.277               |              |
| GALE1   | 2     | A   | 278                    | 124                | 83                   | 71                | 0.255               |              |
| GALE1   | 2     | B   | 401                    | 179                | 127                  | 95                | 0.237               |              |
| GALE1   | total |     | 986                    | 445                | 308                  | 233               | 0.235               | 0.008        |
| GALE2   | 1     | A   | 145                    | 45                 | 53                   | 47                | 0.324               |              |
| GALE2   | 1     | B   | 125                    | 22                 | 46                   | 57                | 0.456               |              |
| GALE2   | 2     | A   | 313                    | 89                 | 114                  | 110               | 0.351               |              |
| GALE2   | 2     | B   | 325                    | 78                 | 101                  | 146               | 0.449               |              |
| GALE2   | total |     | 908                    | 234                | 314                  | 360               | 0.395               | 0.0005       |
| Control | 1     | A   | 254                    | 172                | 74                   | 8                 | 0.031               |              |
| Control | 1     | B   | 246                    | 168                | 62                   | 16                | 0.065               |              |
| Control | 2     | A   | 318                    | 203                | 76                   | 39                | 0.123               |              |
| Control | 2     | B   | 418                    | 257                | 96                   | 65                | 0.156               |              |
| Control | total |     | 1236                   | 800                | 308                  | 128               | 0.094               |              |

**Table S7.** Chromatographic Pump Gradient parameters

Run time: 9.0 min

Seal wash: 5 min

Pressure limits: low: 0 psi, high: 15,000 psi

| Step | Time (min) | Flow (mL/min) | %A   | %B   | Curve     |
|------|------------|---------------|------|------|-----------|
| 1    | (initial)  | 0.400         | 10.0 | 90.0 | (initial) |
| 2    | 5.00       | 0.400         | 20.0 | 80.0 | 6         |
| 3    | 5.50       | 0.400         | 40.0 | 60.0 | 6         |
| 4    | 6.50       | 0.400         | 40.0 | 60.0 | 6         |
| 5    | 9.00       | 0.400         | 10.0 | 90.0 | 1         |

Solvent A = H<sub>2</sub>O + 10mM Ammonium Formate + 0.125% (v/v) Formic Acid (FA) (Fisher UPLC-grade)

Solvent B = 95:5 Acetonitrile:H<sub>2</sub>O + 10mM Ammonium Formate + 0.125% (v/v) FA

Strong Needle Wash = 95:5 ACN: H<sub>2</sub>O

Weak Needle Wash = 90:10 H<sub>2</sub>O:ACN

**Table S8.** Mass Spectrometer Tuning Parameters

Negative ionization mode

Collision energy for different multiple-reaction monitoring (MRM) transitions

| <b>Compound</b> | <b>Parent</b> | <b>Daughter</b> |                 |                      |
|-----------------|---------------|-----------------|-----------------|----------------------|
| <b>Name</b>     | <b>(m/z)</b>  | <b>(m/z)</b>    | <b>Cone (V)</b> | <b>Collision (V)</b> |
| UDP-gal-241     | 564.90        | 241.00          | 35              | 29                   |
| UDP-glc-241     | 564.90        | 241.01          | 35              | 29                   |
| UDP-gal-280     | 564.90        | 279.90          | 35              | 27                   |
| UDP-glc-280     | 564.90        | 279.91          | 35              | 27                   |
| UDP-gal-403     | 564.90        | 403.00          | 35              | 22                   |
| UDP-glc-403     | 564.90        | 403.01          | 35              | 22                   |
| UDP-galNAc-159  | 606.00        | 159.00          | 39              | 44                   |
| UDP-glcNAc-159  | 606.00        | 159.01          | 39              | 44                   |
| UDP-galNAc-273  | 606.00        | 272.90          | 39              | 32                   |
| UDP-glcNAc-273  | 606.00        | 272.91          | 39              | 32                   |
| UDP-galNAc-282  | 606.00        | 282.00          | 39              | 27                   |
| UDP-glcNAc-282  | 606.00        | 282.01          | 39              | 27                   |
| UDP-galNAc-385  | 606.00        | 384.90          | 39              | 24                   |
| UDP-glcNAc-385  | 606.00        | 384.91          | 39              | 24                   |
| UDP-galNAc-403  | 606.00        | 403.00          | 39              | 23                   |
| UDP-glcNAc-403  | 606.00        | 403.01          | 39              | 23                   |

**Table S9.** Sugar Retention Times

| <b>Sugar</b> | <b>Retention Time (min.)</b> |
|--------------|------------------------------|
| UDP-glc      | 4.37                         |
| UDP-gal      | 4.60                         |
| DP-glcNAc    | 4.76                         |
| UDP-galNAc   | 4.98                         |
